# Supplementary material for: Screening for identification of patients at high risk for diabetes-related foot ulcers: a cross-sectional study
Source: PubMed Central journal article supplement — J Int Med Res. 2022 Mar 28;50(3):03000605221087815. doi: 10.1177/03000605221087815 (PMC8966102; doi:10.1177/03000605221087815), 2022-03-28

**Screening for Identification of High-Risk Patients for Diabetes related Foot Ulcers: A cross sectional study design**

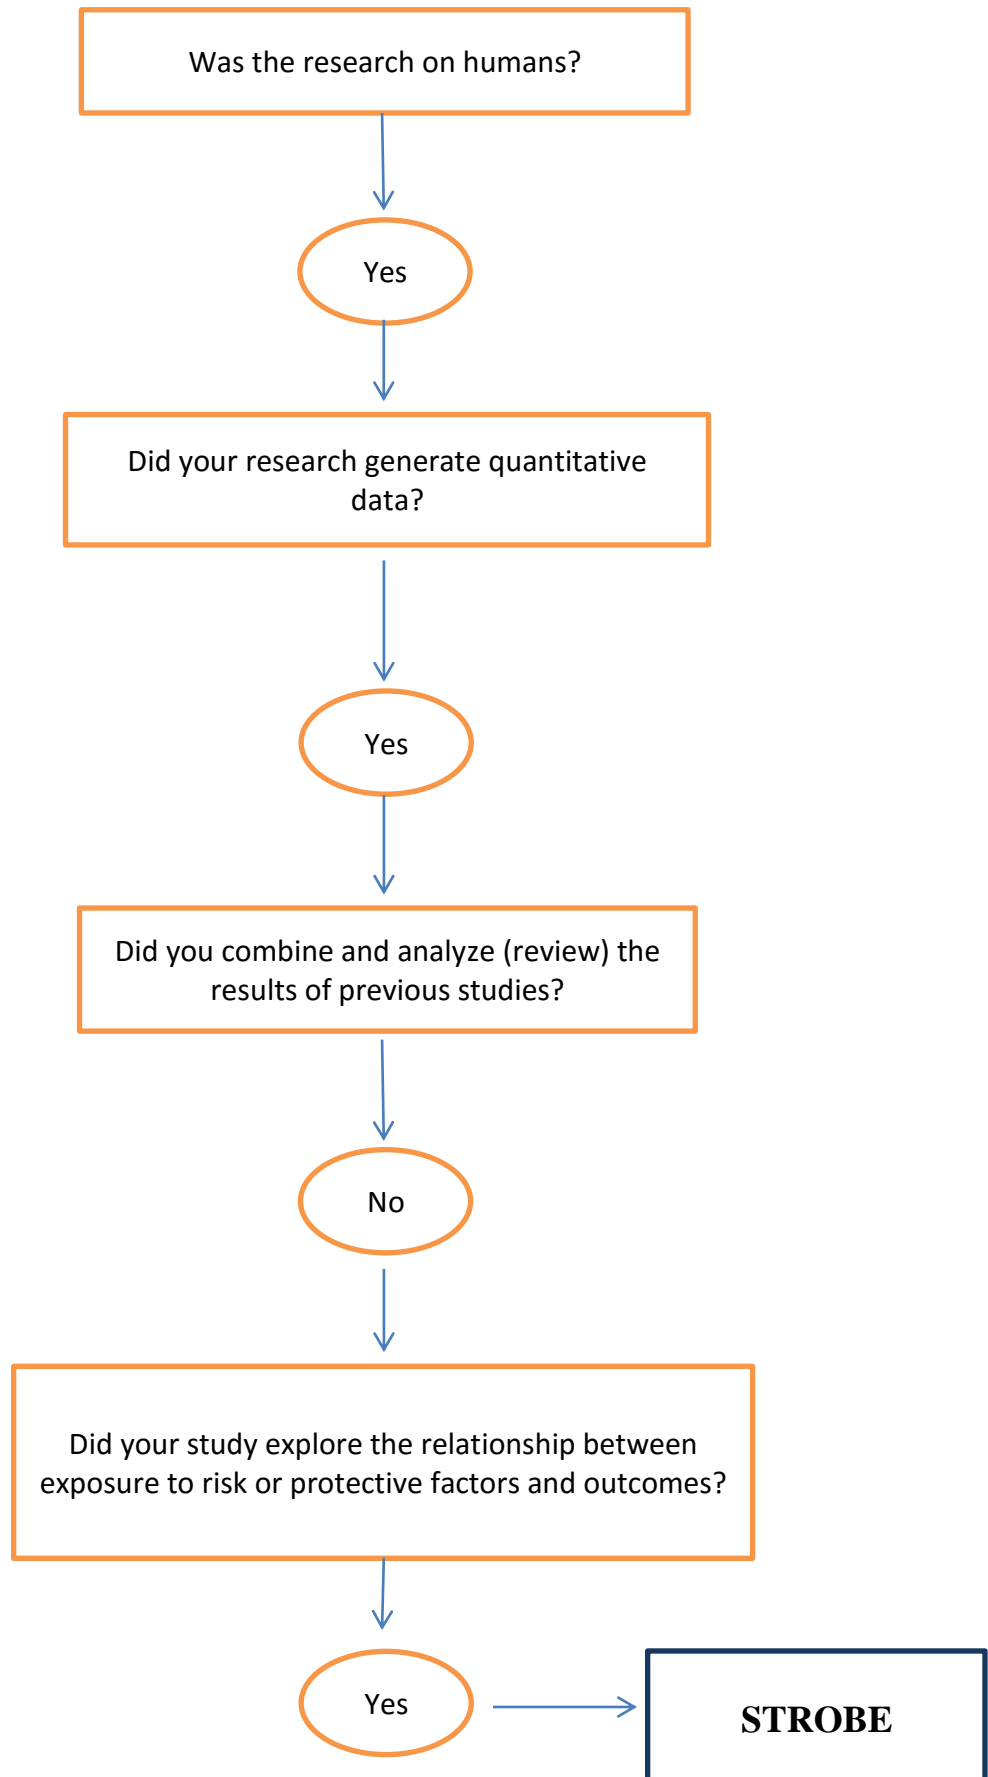

Supplement: sj-pdf-1-imr-10.1177_03000605221087815.pdf [file sj-pdf-1-imr-10.1177_03000605221087815.pdf]
